# Supplementary material for: First Detection of DS-1-like G1P[8] Double-gene Reassortant Rotavirus Strains on The American Continent, Brazil, 2013
Source: PubMed Central journal article supplement (PMC6379365; doi:10.1038/s41598-019-38703-7), 2019-02-18
Supplement: 41598_2019_38703_MOESM1_ESM.pdf [file 41598_2019_38703_MOESM1_ESM.pdf]

**FIRST DETECTION OF DS-1-LIKE G1P[8] DOUBLE-GENE REASSORTANT ROTAVIRUS STRAINS ON  
THE AMERICAN CONTINENT, BRAZIL, 2013**

Adriana Luchs<sup>1,\*</sup>, Antonio Charlys da Costa<sup>2,3</sup>, Audrey Cilli<sup>1</sup>, Shirley Cavalcante Vasconcelos Komninakis<sup>4,5</sup>, Rita de Cássia Compagnoli Carmona<sup>1</sup>, Simone Guadagnucci Morillo<sup>1</sup>, Ester Cerdeira Sabino<sup>2,3</sup>, Maria do Carmo Sampaio Tavares Timenetsky<sup>1,\*</sup>

<sup>1</sup>Enteric Disease Laboratory, Virology Center, Adolfo Lutz Institute, São Paulo, Brazil

<sup>2</sup>LIM/46 - Laboratory of Medical Parasitology, Department of Infectious and Parasitic Diseases, College of Medicine, University of São Paulo, São Paulo, Brazil

<sup>3</sup>Institute of Tropical Medicine, University of São Paulo, São Paulo, Brazil

<sup>4</sup>Postgraduate Program in Health Science, Faculty of Medicine of ABC, Santo André, Brazil

<sup>5</sup>Retrovirology Laboratory, Federal University of São Paulo, São Paulo, São Paulo, Brazil

\*Corresponding author: Adriana Luchs, Maria do Carmo Sampaio Tavares Timenetsky

Instituto Adolfo Lutz, Centro de Virologia, Núcleo de Doenças Entéricas.

Address: Av. Dr Arnaldo, nº 355, São Paulo, SP, Brasil, 01246-902

Fax: 55-11-3088 3753; phone: 55-11-3068 2909

e-mail: [driluchs@gmail.com](mailto:driluchs@gmail.com); [timenetsky.m@gmail.com](mailto:timenetsky.m@gmail.com)

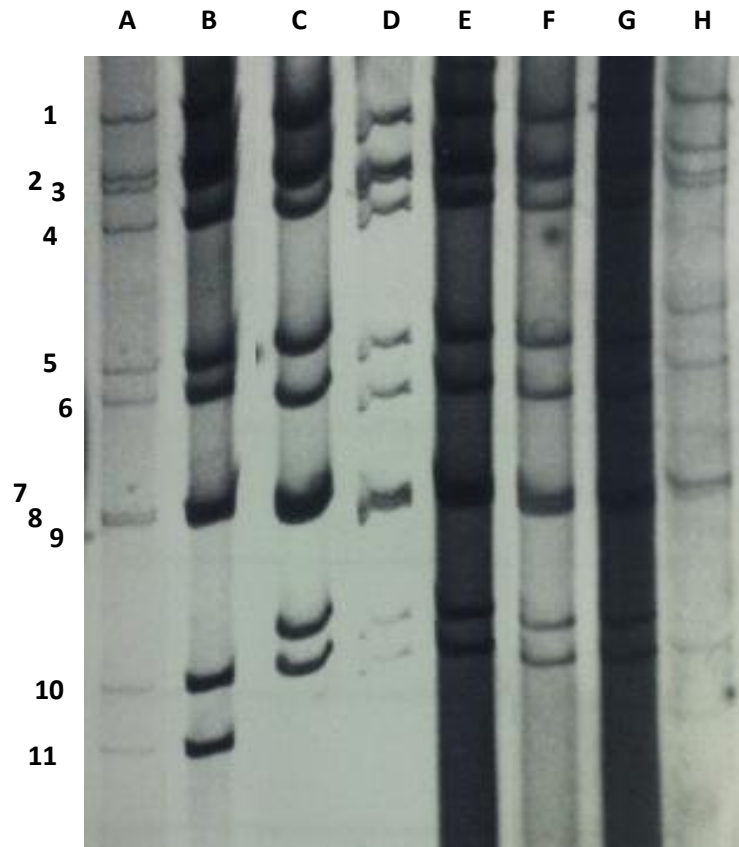

**Supplement 1.** Poliactrylamide gel electrophoresis of G1P[8] RVA strains identified in Brazil, 2013-2017. Lines A and B: Wa-like G1P[8] strains long electropherotype; Lines C to G: DS-1-like G1P[8] strains short electropherotype; Line H: SA11 positive control. Numbers are indicating the eleven RVA dsRNA segments.

**Supplement 2.** Socio-demographic data of Brazilian patients with Wa-like G1P[8] and DS-1-like G1P[8] RVA infection, 2013-2017.

| Age      | Sex | City            | State | Month     | Year | Electrophoresis<br>profile | Genotype         | RVA<br>Vaccine   | Strain    |
|----------|-----|-----------------|-------|-----------|------|----------------------------|------------------|------------------|-----------|
| 9 months | M   | São Paulo       | SP    | March     | 2013 | Long                       | Wa-like G1P[8]   | Yes <sup>†</sup> | ---       |
| 8 months | M   | São Paulo       | SP    | August    | 2013 | Long                       | Wa-like G1P[8]   | *                | ---       |
| 2 years  | F   | São Paulo       | SP    | August    | 2013 | Short                      | DS-1-like G1P[8] | No               | ---       |
| 3 years  | F   | São Paulo       | SP    | September | 2013 | Short                      | DS-1-like G1P[8] | No               | ---       |
| 1 year   | M   | Mogi das Cruzes | SP    | September | 2013 | Short                      | DS-1-like G1P[8] | *                | IAL-R3122 |
| 5 years  | F   | Mogi das Cruzes | SP    | September | 2013 | Short                      | DS-1-like G1P[8] | *                | IAL-R3123 |
| 3 years  | F   | Mogi das Cruzes | SP    | September | 2013 | Short                      | DS-1-like G1P[8] | *                | ---       |
| 5 years  | F   | Guarulhos       | SP    | September | 2013 | Long                       | Wa-like G1P[8]   | *                | ---       |
| 77 years | F   | Guarulhos       | SP    | September | 2013 | Long                       | Wa-like G1P[8]   | No               | ---       |
| 6 months | F   | São Paulo       | SP    | September | 2013 | Long                       | Wa-like G1P[8]   | *                | ---       |
| 1 years  | M   | São Paulo       | SP    | September | 2013 | Long                       | Wa-like G1P[8]   | Yes <sup>†</sup> | ---       |
| 1 years  | M   | São Paulo       | SP    | September | 2013 | Short                      | DS-1-like G1P[8] | *                | IAL-R3165 |

|          |   |                          |    |           |      |       |                  |                  |           |
|----------|---|--------------------------|----|-----------|------|-------|------------------|------------------|-----------|
| 1 years  | F | São Paulo                | SP | September | 2013 | Short | DS-1-like G1P[8] | Yes <sup>†</sup> | ---       |
| 48 years | F | Osasco                   | SP | September | 2013 | Short | DS-1-like G1P[8] | No               | ---       |
| 8 years  | F | São Luis de Belos Montes | GO | September | 2013 | Short | DS-1-like G1P[8] | No               | IAL-R3172 |
| 3 years  | F | São Paulo                | SP | September | 2013 | Short | DS-1-like G1P[8] | Yes <sup>†</sup> | ---       |
| 1 year   | M | Guarulhos                | SP | October   | 2013 | Short | DS-1-like G1P[8] | Yes <sup>†</sup> | ---       |
| 7 years  | M | Guarulhos                | SP | October   | 2013 | Short | DS-1-like G1P[8] | *                | ---       |
| 12 years | M | São Luis de Belos Montes | GO | October   | 2013 | Short | DS-1-like G1P[8] | No               | ---       |
| 3 years  | F | Matelandia               | PR | October   | 2013 | Long  | Wa-like G1P[8]   | *                | ---       |
| 2 years  | M | Matelandia               | PR | October   | 2013 | Long  | Wa-like G1P[8]   | *                | ---       |
| 2 years  | M | Matelandia               | PR | October   | 2013 | Long  | Wa-like G1P[8]   | *                | ---       |
| 2 years  | F | Matelandia               | PR | October   | 2013 | Long  | Wa-like G1P[8]   | *                | ---       |
| 3 years  | M | Matelandia               | PR | October   | 2013 | Long  | Wa-like G1P[8]   | *                | ---       |
| 1 year   | M | Matelandia               | PR | October   | 2013 | Long  | Wa-like G1P[8]   | *                | ---       |
| 10 years | M | Matelandia               | PR | October   | 2013 | Long  | Wa-like G1P[8]   | *                | ---       |
| ---      | F | Goiânia                  | GO | November  | 2013 | Long  | Wa-like G1P[8]   | *                | ---       |

|          |   |                  |    |          |      |      |                |                  |     |
|----------|---|------------------|----|----------|------|------|----------------|------------------|-----|
| 2 years  | M | Pontal do Paraná | PR | February | 2014 | Long | Wa-like G1P[8] | *                | --- |
| 33 years | M | Goiânia          | GO | April    | 2014 | Long | Wa-like G1P[8] | *                | --- |
| 2 months | M | São Paulo        | SP | July     | 2015 | Long | Wa-like G1P[8] | Yes <sup>†</sup> | --- |

---

State of São Paulo (SP), State of Goiás (GO), State of Paraná (PR)

\*Not known

<sup>†</sup>Number of doses not informed

**Supplement 3.** Sequence data for the 11 genome segments of four DS-1-like G1P[8] rotaviruses

| Strain                                 | Sequence reads                | Genome segments |       |      |      |       |      |      |      |      |
|----------------------------------------|-------------------------------|-----------------|-------|------|------|-------|------|------|------|------|
|                                        |                               | VP1             | VP2   | VP3  | VP4  | VP6   | VP7  | NSP1 | NSP2 | NSP3 |
| RVA/Human-wt/BRA/IAL-R3122/2013/G1P[8] | Length                        | 3302            | 2684  | 2591 | 2359 | 1356  | 1062 | 1566 | 1059 | 1066 |
|                                        | Total reads for each segments | 97x             | 49x   | 48x  | 43x  | 239x  | 37x  | 29x  | 44x  | 18x  |
| RVA/Human-wt/BRA/IAL-R3123/2013/G1P[8] | Length                        | 3302            | 2684  | 2591 | 2359 | 1356  | 1062 | 1566 | 1059 | 1066 |
|                                        | Total reads for each segments | 2130x           | 1071x | 846x | 748x | 1520x | 574x | 303x | 472x | 220x |
| RVA/Human-wt/BRA/IAL-R3165/2013/G1P[8] | Length                        | 3302            | 2684  | 2591 | 2359 | 1356  | 1062 | 1566 | 1059 | 1066 |
|                                        | Total reads for each segments | 61x             | 18x   | 14x  | 18x  | 58x   | 12x  | 25x  | 16x  | 10x  |
| RVA/Human-wt/BRA/IAL-R3172/2013/G1P[8] | Length                        | 3302            | 2684  | 2591 | 2359 | 1356  | 1062 | 1566 | 1059 | 1066 |
|                                        | Total reads for each segments | 287x            | 177x  | 145x | 145x | 473x  | 136x | 55x  | 144x | 48x  |

**Supplement 4.** Raw data of the sequence of four Brazilian DS-1-like G1P[8] rotaviruses.

| Sample                                 | Total reads >Q30 | % Human | % Bacteria | % Fungus | Other viroses* |
|----------------------------------------|------------------|---------|------------|----------|----------------|
| RVA/Human-wt/BRA/IAL-R3122/2013/G1P[8] | 18100            | 0       | 1          | 0        | 9              |
| RVA/Human-wt/BRA/IAL-R3123/2013/G1P[8] | 46782            | 0       | 0          | 0        | 19             |
| RVA/Human-wt/BRA/IAL-R3165/2013/G1P[8] | 22382            | 0       | 0          | 0        | 8              |
| RVA/Human-wt/BRA/IAL-R3172/2013/G1P[8] | 22818            | 0       | 0          | 0        | 22             |

\*Other viruses identified in the samples were not evaluated.

Supplement 5. The genotype constellation of four sequenced Brazilian DS-1-like G1P[8] as well as the reference strains used in the phylogenetic analysis.

|    | Name of strain | Country of isolation     | Year of isolation | VP7 | VP4  | VP6 | VP1 | VP2 | VP3 | NSP1 | NSP2 | NSP3 | NSP4 |
|----|----------------|--------------------------|-------------------|-----|------|-----|-----|-----|-----|------|------|------|------|
| 1  | IAL-R3122      | Brazil                   | 2013              | G1  | P[8] | I2  | R2  | C2  | M2  | A2   | N2   | T2   | E2   |
| 2  | IAL-R3123      | Brazil                   | 2013              | G1  | P[8] | I2  | R2  | C2  | M2  | A2   | N2   | T2   | E2   |
| 3  | IAL-R3165      | Brazil                   | 2013              | G1  | P[8] | I2  | R2  | C2  | M2  | A2   | N2   | T2   | E2   |
| 4  | IAL-R3172      | Brazil                   | 2013              | G1  | P[8] | I2  | R2  | C2  | M2  | A2   | N2   | T2   | E2   |
| 5  | SKT-109        | Thailand                 | 2013              | G1  | P[8] | I2  | R2  | C2  | M2  | A2   | N2   | T2   | E2   |
| 6  | BID285         | Malawi                   | 2013              | G1  | P[8] | I2  | R2  | C2  | M2  | A2   | N2   | T2   | E2   |
| 7  | HC12016        | Japan                    | 2012              | G1  | P[8] | I2  | R2  | C2  | M2  | A2   | N2   | T2   | E2   |
| 8  | PCB-180        | Thailand                 | 2013              | G1  | P[8] | I2  | R2  | C2  | M2  | A2   | N2   | T2   | E2   |
| 9  | To14-41        | Japan                    | 2014              | G1  | P[8] | I2  | R2  | C2  | M2  | A2   | N2   | T2   | E2   |
| 10 | SP026          | Vietnam                  | 2012              | G1  | P[8] | I2  | R2  | C2  | M2  | A2   | N2   | T2   | E2   |
| 11 | TGO12-004      | Philippines              | 2012              | G1  | P[8] | I2  | R2  | C2  | M2  | A2   | N2   | T2   | E2   |
| 12 | KN041          | Japan                    | 2012              | G1  | P[8] | I2  | R2  | C2  | M2  | A2   | N2   | T2   | E2   |
| 13 | TGO12-045      | Philippines              | 2012              | G1  | P[8] | I2  | R2  | C2  | M2  | A2   | N2   | T2   | E2   |
| 14 | OH3625         | Japan                    | 2012              | G1  | P[8] | I2  | Rx  | Cx  | Mx  | Ax   | Nx   | Tx   | E2   |
| 15 | Dhaka16        | Bangladesh               | 2003              | G1  | P[8] | I1  | R1  | C1  | M1  | A1   | N1   | T1   | E1   |
| 16 | Rotarix        | United States of America | 1988              | G1  | P[8] | I1  | R1  | C1  | M1  | A1   | N1   | T1   | E1   |
| 17 | Rotateq        | United States of America | 1992              | G1  | P[5] | I2  | R2  | C2  | M1  | A3   | N2   | T6   | E2   |
| 18 | BE00094        | Belgium                  | 2009              | G1  | P[8] | I1  | R1  | C1  | M1  | A1   | N1   | T1   | E1   |
| 19 | B74-02         | Belgium                  | 2002              | G1  | P[8] | I1  | R1  | C1  | M1  | A1   | N1   | T1   | E1   |
| 20 | R321-2004      | Brazil                   | 2004              | G1  | P[8] | I1  | R1  | C1  | M1  | A1   | N1   | T1   | E1   |
| 21 | 2007719635     | United States of America | 2007              | G1  | P[8] | I1  | R1  | C1  | M1  | A1   | N1   | T1   | E1   |
| 22 | QUI-150-F1     | Brazil                   | 2010              | G1  | P[8] | I1  | R1  | C1  | M1  | A1   | N1   | T1   | E1   |
| 23 | CU957-KK/11    | Thailand                 | 2011              | G1  | P[8] | I1  | R1  | C1  | M1  | A1   | N1   | T1   | E1   |
| 24 | D              | United States of America | 1974              | G1  | P[8] | I1  | R1  | C1  | M1  | A1   | N1   | T1   | E1   |
| 25 | 9J             | Nicaragua                | 2010              | G1  | P[8] | I1  | R1  | C1  | M1  | A1   | N2   | T1   | E1   |
| 26 | CK00083        | Australia                | 2008              | G1  | P[8] | Ix  | Rx  | Cx  | Mx  | Ax   | Nx   | Tx   | Ex   |
| 27 | PA258          | Italy                    | 1997              | G1  | P[8] | Ix  | Rx  | Cx  | Mx  | Ax   | Nx   | Tx   | Ex   |
| 28 | Mvd9806        | Uruguay                  | 1996              | G1  | P[8] | Ix  | Rx  | Cx  | Mx  | Ax   | Nx   | Tx   | Ex   |
| 29 | PA78/89        | Italy                    | 1989              | G1  | P[8] | Ix  | Rx  | Cx  | Mx  | Ax   | Nx   | Tx   | Ex   |
| 30 | PA10/90        | Italy                    | 1990              | G1  | P[8] | Ix  | Rx  | Cx  | Mx  | Ax   | Nx   | Tx   | Ex   |
| 31 | PA33/99        | Italy                    | 1999              | G1  | P[8] | Ix  | Rx  | Cx  | Mx  | Ax   | Nx   | Tx   | Ex   |
| 32 | Mvd9606        | Uruguay                  | 1996              | G1  | P[8] | Ix  | Rx  | Cx  | Mx  | Ax   | Nx   | Tx   | Ex   |
| 33 | Py03IPN144     | Paraguay                 | 2002-2005         | G1  | P[8] | Ix  | Rx  | Cx  | Mx  | Ax   | Nx   | Tx   | Ex   |
| 34 | Brz-6          | Brazil                   | 1995              | G1  | P[8] | Ix  | Rx  | Cx  | Mx  | Ax   | Nx   | Tx   | Ex   |
| 35 | 87Y1397        | Japan                    | xxxx              | G1  | P[8] | Ix  | Rx  | Cx  | Mx  | Ax   | Nx   | Tx   | Ex   |
| 36 | k54            | United States of America | xxxx              | G1  | P[x] | Ix  | Rx  | Cx  | Mx  | Ax   | Nx   | Tx   | Ex   |
| 37 | Kor-64         | South Korea              | 1988              | G1  | P[x] | Ix  | Rx  | Cx  | Mx  | Ax   | Nx   | Tx   | Ex   |
| 38 | Isr-56         | Israel                   | 1995              | G1  | P[x] | Ix  | Rx  | Cx  | Mx  | Ax   | Nx   | Tx   | Ex   |
| 39 | AU19           | Japan                    | xxxx              | G1  | P[x] | Ix  | Rx  | Cx  | Mx  | Ax   | Nx   | Tx   | Ex   |
| 40 | C60            | Venezuela                | xxxx              | G1  | P[x] | Ix  | Rx  | Cx  | Mx  | Ax   | Nx   | Tx   | Ex   |
| 41 | T449           | Unknown                  | xxxx              | G1  | P[x] | Ix  | Rx  | Cx  | Mx  | Ax   | Nx   | Tx   | Ex   |
| 42 | R70            | Brazil                   | 1997              | G1  | P[9] | I1  | R1  | C1  | M3  | A1   | N1   | T2   | E1   |
| 43 | SS98244047     | Spain                    | 2015              | G3  | P[8] | I2  | R2  | C2  | M2  | A2   | N2   | T2   | E2   |
| 44 | SKT-239        | Thailand                 | 2013              | G3  | P[8] | I2  | R2  | C2  | M2  | A2   | N2   | T2   | E2   |
| 45 | 3000390639     | United States of America | 2015              | G3  | P[8] | I2  | R2  | C2  | M2  | A2   | N2   | T2   | E2   |
| 46 | ERN8263        | Hungary                  | 2015              | G3  | P[8] | I2  | R2  | C2  | M2  | A2   | N2   | T2   | E2   |
| 47 | WAPC2016       | Australia                | 2014              | G3  | P[8] | I2  | R2  | C2  | M2  | A2   | N2   | T2   | E2   |
| 48 | WAPC1740       | Australia                | 2013              | G3  | P[8] | I2  | R2  | C2  | M2  | A2   | N2   | T2   | E2   |
| 49 | IS1078         | Japan                    | 2015              | G3  | P[8] | I2  | R2  | C2  | M2  | A2   | N2   | T2   | E2   |
| 50 | ITO            | Japan                    | 1981              | G3  | P[8] | Ix  | Rx  | Cx  | Mx  | Ax   | Nx   | Tx   | Ex   |
| 51 | BE87           | Belgium                  | 2011              | G2  | P[4] | I2  | R2  | C2  | M2  | A2   | N2   | T2   | E2   |
| 52 | 07Y003         | Japan                    | 2007              | G2  | P[4] | I2  | R2  | C2  | M2  | A2   | N2   | T2   | E2   |
| 53 | PA108          | Italy                    | 2007              | G2  | P[4] | I2  | R2  | C2  | M2  | A2   | N2   | T2   | E2   |
| 54 | J306           | Bangladesh               | 2010              | G2  | P[4] | I2  | R2  | C2  | M2  | A2   | N2   | T2   | E2   |



|     |             |                                  |      |     |      |    |    |    |    |    |    |    |    |
|-----|-------------|----------------------------------|------|-----|------|----|----|----|----|----|----|----|----|
| 55  | J263        | Bangladesh                       | 2010 | G2  | P[4] | I2 | R2 | C2 | M2 | A2 | N2 | T2 | E2 |
| 56  | LB2772      | United States of America         | 2005 | G2  | P[4] | I2 | R2 | C2 | M2 | A2 | N2 | T2 | E2 |
| 57  | LB2764      | United States of America         | 2005 | G2  | P[4] | I2 | R2 | C2 | M2 | A2 | N2 | T2 | E2 |
| 58  | M334        | Bangladesh                       | 2013 | G2  | P[4] | I2 | R2 | C2 | M2 | A2 | N2 | T2 | E2 |
| 59  | MMC6        | Bangladesh                       | 2005 | G2  | P[4] | I2 | R2 | C2 | M2 | A2 | N2 | T2 | E2 |
| 60  | TB-Chen     | China                            | 1996 | G2  | P[4] | I2 | R2 | C2 | M2 | A2 | N2 | T2 | E2 |
| 61  | 86Y1329     | Japan                            | 1986 | G2  | P[4] | I2 | R2 | C2 | M2 | A2 | N2 | T2 | E2 |
| 62  | KUN         | Japan                            | 1980 | G2  | P[4] | I2 | R2 | C2 | M2 | A2 | N2 | T2 | E2 |
| 63  | D205        | Kenya                            | 1989 | G2  | P[4] | I2 | R2 | C2 | M2 | A2 | N2 | T2 | E2 |
| 64  | 89Y1520     | Japan                            | 1989 | G2  | P[4] | I2 | R2 | C2 | M2 | A2 | N2 | T2 | E2 |
| 65  | 83A001      | Japan                            | 1983 | G2  | P[4] | I2 | R2 | C2 | M2 | A2 | N2 | T2 | E2 |
| 66  | SE19300     | Brazil                           | 2010 | G2  | P[4] | I2 | R2 | C2 | M2 | A2 | N2 | T2 | E2 |
| 67  | MS11142     | Brazil                           | 2005 | G2  | P[4] | I2 | R2 | C2 | M2 | A2 | N2 | T2 | E2 |
| 68  | QUI-60-F1   | Brazil                           | 2008 | G2  | P[4] | I2 | R2 | C2 | M2 | A2 | N2 | T2 | E2 |
| 69  | ES16238     | Brazil                           | 2009 | G2  | P[4] | I2 | R2 | C2 | M2 | A2 | N2 | T2 | E2 |
| 70  | RJ12225     | Brazil                           | 2006 | G2  | P[4] | I2 | R2 | C2 | M2 | A2 | N2 | T2 | E2 |
| 71  | MA14286     | Brazil                           | 2007 | G2  | P[4] | I2 | R2 | C2 | M2 | A2 | N2 | T2 | E2 |
| 72  | SC19868     | Brazil                           | 2011 | G2  | P[4] | I2 | R2 | C2 | M2 | A2 | N2 | T2 | E2 |
| 73  | CK20001     | Australia                        | 1977 | G2  | P[4] | I2 | R2 | C2 | M2 | A2 | N2 | T2 | E2 |
| 74  | CK20033     | Australia                        | 2006 | G2  | P[4] | I2 | R2 | C2 | M2 | A2 | N2 | T2 | E2 |
| 75  | CK20047     | Australia                        | 2011 | G2  | P[4] | I2 | R2 | C2 | M2 | A2 | N2 | T2 | E2 |
| 76  | B110119     | Japan                            | 2011 | G2  | P[4] | I2 | R2 | C2 | M2 | A2 | N2 | T2 | E2 |
| 77  | 2007769964  | United States of America         | 2007 | G2  | P[4] | I2 | R2 | C2 | M2 | A2 | N2 | T2 | E2 |
| 78  | PA111       | Italy                            | 1996 | G2  | P[4] | I2 | R2 | C2 | M2 | A2 | N2 | T2 | E2 |
| 79  | B110056     | Japan                            | 2011 | G2  | P[4] | I2 | R2 | C2 | M2 | A2 | N2 | T2 | E2 |
| 80  | 83A001      | Japan                            | 1983 | G2  | P[4] | I2 | R2 | C2 | M2 | A2 | N2 | T2 | E2 |
| 81  | MMC88       | Bangladesh                       | 2005 | G2  | P[4] | I2 | R2 | C2 | M2 | A2 | N2 | T2 | E2 |
| 82  | RT128-07    | Canada                           | 2008 | G2  | P[4] | I2 | R2 | C2 | M2 | A2 | N2 | T2 | E2 |
| 83  | Ghan-148    | Ghana                            | 2007 | G2  | P[4] | I2 | R2 | C2 | M2 | A2 | N2 | T2 | E2 |
| 84  | J253        | Bangladesh                       | 2010 | G2  | P[4] | I2 | R2 | C2 | M2 | A2 | N2 | T2 | E2 |
| 85  | V233        | Australia                        | 199  | G2  | P[4] | I2 | R2 | C2 | M2 | A2 | N2 | T2 | E2 |
| 86  | I16E3D      | India                            | 1999 | G2  | P[4] | I2 | R2 | C2 | M2 | A2 | N2 | T2 | E2 |
| 87  | J303        | Bangladesh                       | 2010 | G2  | P[4] | I2 | R2 | C2 | M2 | A2 | N2 | T2 | E2 |
| 88  | 90A009      | Japan                            | 1990 | G2  | P[4] | I2 | R2 | C2 | M2 | A2 | N1 | T2 | E2 |
| 89  | 90H094      | Japan                            | 1990 | G2  | P[4] | I2 | R2 | C2 | M2 | A2 | N1 | T2 | E2 |
| 90  | AK26        | Kenya                            | 1982 | G2  | P[4] | I2 | R2 | C2 | M2 | A2 | N1 | T2 | E2 |
| 91  | CU616-TK/09 | Thailand                         | 2009 | G12 | P[8] | Ix | Rx | Cx | Mx | Ax | Nx | Tx | Ex |
| 92  | RJ12419     | Brazil                           | 2006 | G12 | P[8] | I1 | R1 | C1 | M1 | A1 | N1 | T1 | E1 |
| 93  | QUI-154-F1  | Brazil                           | 2010 | G12 | P[6] | I2 | R2 | C2 | M2 | A2 | N2 | T2 | E2 |
| 94  | RV161       | Bangladesh                       | 2010 | G12 | P[6] | I2 | R2 | C2 | M2 | A2 | N2 | T2 | E1 |
| 95  | L26         | Philippines                      | 1987 | G12 | P[4] | I2 | R2 | C2 | M1 | A2 | N1 | T2 | E2 |
| 96  | OP530       | Malawi                           | 1999 | G4  | P[8] | Ix | Rx | Cx | Mx | Ax | Nx | Tx | Ex |
| 97  | MW670       | Malawi                           | 1999 | G4  | P[8] | Ix | Rx | Cx | Mx | Ax | Nx | Tx | Ex |
| 98  | B1711       | Belgium                          | 2002 | G6  | P[6] | I2 | R2 | C2 | M2 | A2 | N2 | T2 | E2 |
| 99  | 469         | Paraguay                         | 2000 | G9  | P[8] | I1 | R1 | C1 | M1 | A1 | N1 | T1 | E1 |
| 100 | F45         | Japan                            | 1987 | G9  | P[8] | Ix | Rx | Cx | Mx | Ax | Nx | Tx | Ex |
| 101 | RV11        | India                            | 2011 | G9  | P[4] | I2 | R2 | C2 | M2 | A2 | N2 | T2 | E6 |
| 102 | DRC86       | Democratic Republic of the Congo | 2003 | G8  | P[6] | I2 | R2 | C2 | M2 | A2 | N2 | T2 | E2 |

DS-1-like G1P[8] strains determined in this study: name in red

**Supplement 6.** Gene segments' nucleic acid identity of selected DS-1-like G1P[8] strains. Nucleic acid sequences of all eleven gene segments from Brazilian strains IAL-R3122 (A), IAL-R3123 (B), IAL-R3165 (C), and IAL-R3172 (D) were compared with others DS-1-like G1P[8] strains. For comparison, strains from GenBank were selected as indicated in Figure 1. Identities within the gene segments ORF are given in percentage. Nucleic acid identities below 90% are highlighted in bold face.

(A)

| IAL-R3122                                      | Nucleotide identity (%) |              |      |       |       |       |       |              |       |              |              |
|------------------------------------------------|-------------------------|--------------|------|-------|-------|-------|-------|--------------|-------|--------------|--------------|
|                                                | VP7                     | VP4          | VP1  | VP2   | VP3   | VP6   | NSP1  | NSP2         | NSP3  | NSP4         | NSP5         |
| RVA/Human-wt/BRA/IAL-R3123/2013/G1P[8]         | 100                     | 99.9         | 99.8 | 99.9  | 99.9  | 99.8  | 100   | 99.9         | 99.9  | 99.8         | 99.8         |
| RVA/Human-wt/BRA/IAL-R3165/2013/G1P[8]         | 100                     | 99.8         | 99.4 | 99.8  | 99.9  | 100   | 99.8  | 99.9         | 99.6  | 99.8         | 99.8         |
| RVA/Human-wt/BRA/IAL-R3172/2013/G1P[8]         | 100                     | 99.8         | 99.6 | 99.7  | 99.9  | 99.8  | 99.8  | 99.8         | 99.7  | 100          | 99.7         |
| RVA/Human-wt/MWI/BID2BS/2013/G1P[8]            | <b>85.1</b>             | 94.4         | 94.0 | 97.2  | 95.9  | 98.0  | 97.1  | 97.1*        | 97.2  | 91.3         | 97.7         |
| RVA/Human-wt/JPN/OH3625/2012/G1P[8]            | -                       | -            | -    | -     | -     | -     | -     | -            | -     | <b>86.2</b>  | -            |
| RVA/Human-wt/JPN/KN041/2012/G1P[8]             | -                       | -            | -    | -     | -     | -     | -     | -            | -     | <b>84.8</b>  | -            |
| RVA/Human-wt/JPN/HC12016/2012/G1P[8]           | 93.5*                   | 99.1         | 99.0 | 98.3* | 97.9* | 93.8* | -     | 91.7*        | 92.7* | 90.8*        | <b>89.0*</b> |
| RVA/Human-wt/THA/PCB-180/2013/G1P[8]           | 98.3                    | 97.7         | 99.4 | 99.1  | 98.9  | 98.8  | -     | 98.0         | 99.1  | 97.2         | 97.0*        |
| RVA/Human-wt/PHI/TGO12-004/2012/G1P[8]         | 98.6                    | -            | -    | -     | -     | 97.9  | -     | 97.3         | 99.4  | 98.4         | -            |
| RVA/Human-wt/PHI/TGO12-045/2012/G1P[8]         | -                       | 98.6         | -    | 99.6  | 98.9  | -     | 99.6  | -            | -     | -            | 99.3         |
| RVA/Human-wt/THA/SKT-109/2013/G1P[8]           | -                       | -            | -    | -     | -     | -     | 99.6  | -            | -     | -            | -            |
| RVA/Human-wt/JPN/To14-41/2014/G1P[8]           | -                       | -            | -    | -     | -     | -     | 97.8* | -            | -     | -            | -            |
| RVA/Human-wt/VNM/SP026/2012/G1P[8]             | 90.5*                   | 97.7         | 98.1 | 97.4* | 96.6* | 96.1* | 96.4* | 94.1*        | 94.9  | 92.2*        | 94.7*        |
| RVA/Human-wt/BGD/Dhaka16/2003/G1P[8]           | 96.3                    | 97.4         | -    | -     | -     | -     | -     | -            | -     | -            | -            |
| RVA/Vaccine/USA/Rotarix-AROLA490AB/1988/G1P[8] | <b>89.7*</b>            | <b>89.3</b>  | -    | -     | -     | -     | -     | -            | -     | -            | -            |
| RVA/Vaccine/USA/RotaTeq-WI79-9/1992/G1P7[5]    | 91.6                    | 91.6         | -    | -     | -     | -     | -     | -            | -     | -            | -            |
| RVA/Human-wt/BEL/B74-02/2002/G1P[8]            | <b>89.1*</b>            | -            | -    | -     | -     | -     | -     | -            | -     | -            | -            |
| RVA/Human-wt/USA/2007719635/2007/G1P[8]        | 94.7*                   | -            | -    | -     | -     | -     | -     | -            | -     | -            | -            |
| RVA/Human-wt/USA/CU957-KK/11/2011/G1P[8]       | <b>87.1*</b>            | -            | -    | -     | -     | -     | -     | -            | -     | -            | -            |
| RVA/Human-tc/USA/D/1974/G1P[8]                 | <b>84.5*</b>            | -            | -    | -     | -     | -     | -     | -            | -     | -            | -            |
| RVA/Human-wt/USA/Wa/1974/G1P[8]                | -                       | <b>89.6</b>  | -    | -     | -     | -     | -     | -            | -     | -            | -            |
| RVA/Human-wt/BEL/BE00094/2009/G1P[8]           | -                       | 95.3         | -    | -     | -     | -     | -     | -            | -     | -            | -            |
| RVA/Human-tc/USA/K54/xxxx/G1P[x]               | <b>84.9*</b>            | -            | -    | -     | -     | -     | -     | -            | -     | -            | -            |
| RVA/Human-wt/JPN/AU19/xxxx/G1P[x]              | <b>78.8*</b>            | -            | -    | -     | -     | -     | -     | -            | -     | -            | -            |
| RVA/Bovine-wt/XXX/T449/xxxx/G1P[x]             | <b>85.7</b>             | -            | -    | -     | -     | -     | -     | -            | -     | -            | -            |
| RVA/Human-wt/BRA/QUI-150-F1/2010/G1P[8]        | <b>88.2*</b>            | -            | -    | -     | -     | -     | -     | -            | -     | -            | -            |
| RVA/Human-wt/BRA/R321-2004/2004/G1P[x]         | 91.0                    | -            | -    | -     | -     | -     | -     | -            | -     | -            | -            |
| RVA/Human-tc/BRA/R70/1997/G1P[9]               | 91.0*                   | -            | -    | -     | -     | -     | -     | -            | -     | -            | -            |
| RVA/Human-wt/PAR/Py03IPN144/2002-2005/G1P[8]   | <b>85.7*</b>            | -            | -    | -     | -     | -     | -     | -            | -     | -            | -            |
| RVA/Pig-tc/VEN/C60/xxxx/G1P[x]                 | <b>84.5</b>             | -            | -    | -     | -     | -     | -     | -            | -     | -            | -            |
| RVA/Human-wt/ISR/Isr-56/1995/G1P[x]            | <b>85.1*</b>            | -            | -    | -     | -     | -     | -     | -            | -     | -            | -            |
| RVA/Human-wt/BRA/Brz-6/1995/G1P[x]             | <b>84.1*</b>            | -            | -    | -     | -     | -     | -     | -            | -     | -            | -            |
| RVA/Human-wt/JPN/87Y1397/xxxx/G1P[8]           | 92.9                    | -            | -    | -     | -     | -     | -     | -            | -     | -            | -            |
| RVA/Human-wt/KOR/Kor-64/1988/G1P[x]            | <b>85.4*</b>            | -            | -    | -     | -     | -     | -     | -            | -     | -            | -            |
| RVA/Human-wt/ITA/PA10/90/1990/G1P[8]           | <b>83.5*</b>            | -            | -    | -     | -     | -     | -     | -            | -     | -            | -            |
| RVA/Human-wt/ITA/PA78/89/1989/G1P[8]           | <b>84.0*</b>            | -            | -    | -     | -     | -     | -     | -            | -     | -            | -            |
| RVA/Human-wt/URY/Mvd9606/1996/G1P[8]           | 94.1                    | -            | -    | -     | -     | -     | -     | -            | -     | -            | -            |
| RVA/Human-wt/ITA/PA33/99/1999/G1P[8]           | <b>83.3*</b>            | -            | -    | -     | -     | -     | -     | -            | -     | -            | -            |
| RVA/Human-wt/NCA/9J/2010/G1P[8]                | <b>88.4*</b>            | 97.1         | -    | -     | -     | -     | -     | -            | -     | -            | -            |
| RVA/Human-wt/AUS/CK00083/2008/G1P[8]           | 92.5*                   | -            | -    | -     | -     | -     | -     | -            | -     | -            | -            |
| RVA/Human-wt/URY/Mvd9806/1996/G1P[8]           | 97.1                    | -            | -    | -     | -     | -     | -     | -            | -     | -            | -            |
| RVA/Human-wt/ITA/PA258/97/1997/G1P[8]          | <b>82.7*</b>            | -            | -    | -     | -     | -     | -     | -            | -     | -            | -            |
| RVA/Human-wt/AUS/WAPC1740/2013/G3P[8]          | -                       | -            | -    | -     | -     | -     | 99.6  | 99.7         | -     | -            | -            |
| RVA/Human-wt/AUS/WAPC2016/2014/G3P[8]          | -                       | -            | -    | 99.3  | 98.7  | 99.5  | -     | -            | -     | -            | 99.5         |
| RVA/Human-wt/ESP/SS98244047/2015/G3P[8]        | -                       | -            | -    | -     | -     | -     | -     | 99.4         | 99.3  | 97.7         | 99.1         |
| RVA/Human-wt/JPN/IS1078/2015/G3P[8]            | -                       | -            | -    | -     | -     | 99.1  | 99.3  | -            | 99.5  | 97.4         | -            |
| RVA/Human-wt/USA/3000390639/2015/G3P[8]        | -                       | -            | 98.6 | -     | -     | -     | -     | -            | -     | -            | -            |
| RVA/Human-wt/HUN/ERN8263/2015/G3P[8]           | -                       | -            | 98.8 | -     | -     | -     | -     | -            | -     | -            | -            |
| RVA/Human-wt/THA/SKT-289/2013/G3P[8]           | -                       | 98.3         | -    | 99.2  | 99.2  | -     | -     | -            | -     | -            | -            |
| RVA/Human-wt/USA/DC23/1976/G3P[8]              | -                       | <b>89.6*</b> | -    | -     | -     | -     | -     | -            | -     | -            | -            |
| RVA/Human-wt/AUS/D388/2013/G3P[8]              | -                       | 98.8         | -    | -     | -     | -     | -     | -            | -     | -            | -            |
| RVA/Human-wt/JPN/ITO/1981/G3P[8]               | -                       | <b>88.7</b>  | -    | -     | -     | -     | -     | -            | -     | -            | -            |
| RVA/Human-wt/BEL/BE87/2011/G2P[4]              | -                       | -            | -    | -     | -     | -     | 91.6* | <b>87.4*</b> | -     | <b>49.9*</b> | <b>72.5*</b> |
| RVA/Human-wt/ITA/PA108/2007/G2P[4]             | -                       | -            | -    | -     | 95.9  | 98.6  | 97.8* | -            | -     | -            | -            |
| RVA/Human-wt/JPN/07Y003/2007/G2P[4]            | -                       | -            | -    | -     | -     | -     | 90.6* | -            | -     | -            | -            |
| RVA/Human-wt/BGN/J306/2010/G2P[4]              | -                       | -            | -    | -     | -     | -     | 98.6  | -            | -     | -            | -            |
| RVA/Human-wt/BRA/QUI-60-F1/2008/G2P[4]         | -                       | -            | -    | -     | -     | -     | 96.1* | 94.7*        | 91.2* | 94.6         | 96.3         |
| RVA/Human-wt/BRA/SE19300/2010/G2P[4]           | -                       | -            | -    | -     | -     | -     | 96.1* | 90.8*        | 91.0* | <b>79.6*</b> | 90.1*        |





|                                          |   |             |              |      |              |              |       |             |              |             |      |
|------------------------------------------|---|-------------|--------------|------|--------------|--------------|-------|-------------|--------------|-------------|------|
| RVA/Human-wt/GHA/Ghan-148/2007/G2P[4]    | - | -           | -            | -    | 94.1*        | <b>85.5*</b> | -     | -           | -            | -           | -    |
| RVA/Human-wt/BGN/J253/2010/G2P[4]        | - | -           | -            | -    | 93.7         | -            | -     | -           | -            | -           | -    |
| RVA/Human-wt/BRA/ES16238/2009/G2P[4]     | - | -           | -            | 96.9 | <b>85.8*</b> | 94.3*        | -     | -           | -            | -           | -    |
| RVA/Human-wt/COD/DRC86/2003/G8P[6]       | - | -           | 96.8         | 97.6 | 96.6         | 96.0         | 96.4  | 96.8        | 97.7         | 90.9        | 97.5 |
| RVA/Human-wt/IND/RV09/2009/G9P[4]        | - | -           | -            | -    | -            | -            | 98.4  | -           | -            | -           | -    |
| RVA/Human-wt/BRA/QUI-154-F1/2010/G12P[6] | - | -           | -            | -    | -            | -            | 94.3* | 90.4*       | <b>88.8*</b> | <b>87.3</b> | 96.4 |
| RVA/Human-wt/BGD/RV161/2000/G12P[6]      | - | -           | 98.0         | 98.0 | 96.3         | 97.4         | 96.9  | 97.7        | 97.7         | -           | 98.4 |
| RVA/Human-wt/CHN/TB-Chen/1996/G2P[4]     | - | -           | <b>89.9</b>  | 96.2 | 93.3         | <b>87.1</b>  | 96.1  | <b>86.2</b> | 97.2         | <b>89.6</b> | 97.4 |
| RVA/Human-wt/MWI/MW670/1999/G4P[8]       | - | <b>87.6</b> | -            | -    | -            | -            | -     | -           | -            | -           | -    |
| RVA/Human-wt/MWI/OP530/1999/G4P[8]       | - | <b>87.5</b> | -            | -    | -            | -            | -     | -           | -            | -           | -    |
| RVA/Human-wt/BEL/B1711/2002/G6P[6]       | - | -           | -            | -    | -            | 97.1         | 96.1  | 97.0        | 97.6         | <b>89.2</b> | 97.9 |
| RVA/Human-wt/IND/RV11/2011/G9P[4]        | - | -           | -            | -    | -            | -            | 98.5  | -           | -            | -           | -    |
| RVA/Human-tc/USA/WI61/1983/G9P[8]        | - | 92.1        | -            | -    | -            | -            | -     | -           | -            | -           | -    |
| RVA/Human-wt/MWI/F45/1987/G9P[8]         | - | 91.5        | -            | -    | -            | -            | -     | -           | -            | -           | -    |
| RVA/Human-wt/PRY/469/2000/G9P[8]         | - | 98.0        | -            | -    | -            | -            | -     | -           | -            | -           | -    |
| RVA/Human-wt/THA/CU616-TK/09/2009/G9P[8] | - | 96.7        | -            | -    | -            | -            | -     | -           | -            | -           | -    |
| RVA/Human-wt/PHL/L26/1987/G12P[4]        | - | -           | <b>86.6*</b> | 96.9 | -            | <b>76.7*</b> | -     | -           | 95.7         | -           | -    |
| RVA/Human-tc/KEN/KDH651/2010/G12P[8]     | - | 95.3        | -            | -    | -            | -            | -     | -           | -            | -           | -    |
| RVA/Human-wt/BRA/RJ12419/2006/G12P[8]    | - | 97.4        | -            | -    | -            | -            | -     | -           | -            | -           | -    |

\*Nucleotide identity is based on partial ORF sequences and/or incomplete sequences.

### (C)

| IAL-R3165                                      | Nucleotide identity (%) |             |      |       |       |       |       |       |       |             |              |
|------------------------------------------------|-------------------------|-------------|------|-------|-------|-------|-------|-------|-------|-------------|--------------|
|                                                | VP7                     | VP4         | VP1  | VP2   | VP3   | VP6   | NSP1  | NSP2  | NSP3  | NSP4        | NSP5         |
| RVA/Human-wt/BRA/IAL-R3122/2013/G1P[8]         | 100                     | 99.8        | 99.8 | 99.8  | 99.9  | 100   | 99.8  | 99.9  | 99.6  | 99.8        | 99.8         |
| RVA/Human-wt/BRA/IAL-R3123/2013/G1P[8]         | 100                     | 99.8        | 99.3 | 99.8  | 99.9  | 99.8  | 99.8  | 99.8  | 99.7  | 100         | 100          |
| RVA/Human-wt/BRA/IAL-R3172/2013/G1P[8]         | 100                     | 99.9        | 99.4 | 99.8  | 99.9  | 99.8  | 99.9  | 99.9  | 99.9  | 99.8        | 99.8         |
| RVA/Human-wt/MWI/BID2BS/2013/G1P[8]            | <b>85.1</b>             | 94.5        | 93.7 | 97.3  | 95.8  | 98.0  | 97.3  | 97.2  | 97.6  | 91.4        | 97.6         |
| RVA/Human-wt/JPN/OH3625/2012/G1P[8]            | -                       | -           | -    | -     | -     | -     | -     | -     | -     | <b>86.4</b> | -            |
| RVA/Human-wt/JPN/KN041/2012/G1P[8]             | -                       | -           | -    | -     | -     | -     | -     | -     | -     | <b>84.9</b> | -            |
| RVA/Human-wt/JPN/HC12016/2012/G1P[8]           | 93.5*                   | 99.3        | 98.8 | 98.4* | 97.9* | 93.8* | -     | 91.8* | 93.0* | 90.9*       | <b>89.2*</b> |
| RVA/Human-wt/THA/PCB-180/2013/G1P[8]           | 98.3                    | 97.8        | 99.1 | 99.1  | 98.9  | 98.8  | -     | 98.3* | 99.4  | 97.3        | 97.1*        |
| RVA/Human-wt/PHI/TGO12-004/2012/G1P[8]         | 98.6                    | -           | -    | -     | -     | 97.9  | -     | 97.4  | 99.8  | 98.5        | -            |
| RVA/Human-wt/PHI/TGO12-045/2012/G1P[8]         | -                       | 98.8        | -    | 99.7  | 98.9  | -     | 99.7  | -     | -     | -           | 99.2         |
| RVA/Human-wt/THA/SKT-109/2013/G1P[8]           | -                       | -           | -    | -     | -     | -     | 99.8  | -     | -     | -           | -            |
| RVA/Human-wt/JPN/To14-41/2014/G1P[8]           | -                       | -           | -    | -     | -     | -     | 98.0* | -     | -     | -           | -            |
| RVA/Human-wt/VNM/SPO26/2012/G1P[8]             | 90.5*                   | 97.8        | 97.9 | 97.4* | 96.7* | 96.1* | 96.6* | 94.2* | 95.2  | 92.4*       | 94.8*        |
| RVA/Human-wt/BGD/Dhaka16/2003/G1P[8]           | 96.3                    | 97.5        | -    | -     | -     | -     | -     | -     | -     | -           | -            |
| RVA/Vaccine/USA/Rotarix-AROLA490AB/1988/G1P[8] | <b>89.7*</b>            | <b>89.4</b> | -    | -     | -     | -     | -     | -     | -     | -           | -            |
| RVA/Vaccine/USA/RotaTeq-WI79-9/1992/G1P7[5]    | 91.6                    | 91.7        | -    | -     | -     | -     | -     | -     | -     | -           | -            |
| RVA/Human-wt/BEL/B74-02/2002/G1P[8]            | <b>89.1*</b>            | -           | -    | -     | -     | -     | -     | -     | -     | -           | -            |
| RVA/Human-wt/USA/2007719635/2007/G1P[8]        | 94.7*                   | -           | -    | -     | -     | -     | -     | -     | -     | -           | -            |
| RVA/Human-wt/USA/CU957-KK/11/2011/G1P[8]       | <b>87.1*</b>            | -           | -    | -     | -     | -     | -     | -     | -     | -           | -            |
| RVA/Human-tc/USA/D/1974/G1P[8]                 | <b>84.5*</b>            | -           | -    | -     | -     | -     | -     | -     | -     | -           | -            |
| RVA/Human-wt/USA/Wa/1974/G1P[8]                | -                       | <b>89.7</b> | -    | -     | -     | -     | -     | -     | -     | -           | -            |
| RVA/Human-wt/BEL/BE00094/2009/G1P[8]           | -                       | 95.5        | -    | -     | -     | -     | -     | -     | -     | -           | -            |
| RVA/Human-tc/USA/K54/xxxx/G1P[x]               | <b>84.9*</b>            | -           | -    | -     | -     | -     | -     | -     | -     | -           | -            |
| RVA/Human-wt/JPN/AU19/xxxx/G1P[x]              | <b>78.8*</b>            | -           | -    | -     | -     | -     | -     | -     | -     | -           | -            |
| RVA/Bovine-wt/XXX/T449/xxxx/G1P[x]             | <b>85.7</b>             | -           | -    | -     | -     | -     | -     | -     | -     | -           | -            |
| RVA/Human-wt/BRA/QUI-150-F1/2010/G1P[8]        | <b>88.2*</b>            | -           | -    | -     | -     | -     | -     | -     | -     | -           | -            |
| RVA/Human-wt/BRA/R321-2004/2004/G1P[x]         | 91.0                    | -           | -    | -     | -     | -     | -     | -     | -     | -           | -            |
| RVA/Human-tc/BRA/R70/1997/G1P[9]               | 91.0*                   | -           | -    | -     | -     | -     | -     | -     | -     | -           | -            |
| RVA/Human-wt/PAR/Py03IPN144/2002-2005/G1P[8]   | <b>85.7*</b>            | -           | -    | -     | -     | -     | -     | -     | -     | -           | -            |
| RVA/Pig-tc/VEN/C60/xxxx/G1P[x]                 | <b>84.5</b>             | -           | -    | -     | -     | -     | -     | -     | -     | -           | -            |
| RVA/Human-wt/ISR/Isr-56/1995/G1P[x]            | <b>85.1*</b>            | -           | -    | -     | -     | -     | -     | -     | -     | -           | -            |
| RVA/Human-wt/BRA/Brz-6/1995/G1P[x]             | <b>84.1*</b>            | -           | -    | -     | -     | -     | -     | -     | -     | -           | -            |
| RVA/Human-wt/JPN/87Y1397/xxxx/G1P[8]           | 92.9                    | -           | -    | -     | -     | -     | -     | -     | -     | -           | -            |
| RVA/Human-wt/KOR/Kor-64/1988/G1P[x]            | <b>85.4*</b>            | -           | -    | -     | -     | -     | -     | -     | -     | -           | -            |
| RVA/Human-wt/ITA/PA10/90/1990/G1P[8]           | <b>83.5*</b>            | -           | -    | -     | -     | -     | -     | -     | -     | -           | -            |
| RVA/Human-wt/ITA/PA78/89/1989/G1P[8]           | <b>84.0*</b>            | -           | -    | -     | -     | -     | -     | -     | -     | -           | -            |
| RVA/Human-wt/URY/Mvd9606/1996/G1P[8]           | 94.1                    | -           | -    | -     | -     | -     | -     | -     | -     | -           | -            |
| RVA/Human-wt/ITA/PA33/99/1999/G1P[8]           | <b>83.3*</b>            | -           | -    | -     | -     | -     | -     | -     | -     | -           | -            |
| RVA/Human-wt/NCA/91/2010/G1P[8]                | <b>88.4*</b>            | 97.2        | -    | -     | -     | -     | -     | -     | -     | -           | -            |
| RVA/Human-wt/AUS/CK00083/2008/G1P[8]           | 92.5*                   | -           | -    | -     | -     | -     | -     | -     | -     | -           | -            |
| RVA/Human-wt/URY/Mvd9806/1996/G1P[8]           | 97.1                    | -           | -    | -     | -     | -     | -     | -     | -     | -           | -            |
| RVA/Human-wt/ITA/PA258/97/1997/G1P[8]          | <b>82.7*</b>            | -           | -    | -     | -     | -     | -     | -     | -     | -           | -            |
| RVA/Human-wt/AUS/WAPC1740/2013/G3P[8]          | -                       | -           | -    | -     | -     | -     | 99.7  | 99.6  | -     | -           | -            |
| RVA/Human-wt/AUS/WAPC2016/2014/G3P[8]          | -                       | -           | -    | 99.4  | 98.8  | 99.5  | -     | -     | -     | -           | 99.3         |
| RVA/Human-wt/ESP/SS98244047/2015/G3P[8]        | -                       | -           | -    | -     | -     | -     | -     | 99.5  | 99.7  | 97.8        | 99.0         |
| RVA/Human-wt/JPN/IS1078/2015/G3P[8]            | -                       | -           | -    | -     | -     | 99.1  | 99.4  | -     | 99.9  | 97.6        | -            |

|                                          |   |              |              |              |              |              |              |              |              |              |              |   |
|------------------------------------------|---|--------------|--------------|--------------|--------------|--------------|--------------|--------------|--------------|--------------|--------------|---|
| RVA/Human-wt/USA/3000390639/2015/G3P[8]  | - | -            | 98.4         | -            | -            | -            | -            | -            | -            | -            | -            | - |
| RVA/Human-wt/HUN/ERN8263/2015/G3P[8]     | - | -            | 98.6         | -            | -            | -            | -            | -            | -            | -            | -            | - |
| RVA/Human-wt/THA/SKT-289/2013/G3P[8]     | - | 98.5         | -            | 99.2         | 99.3         | -            | -            | -            | -            | -            | -            | - |
| RVA/Human-wt/USA/DC23/1976/G3P[8]        | - | <b>89.7*</b> | -            | -            | -            | -            | -            | -            | -            | -            | -            | - |
| RVA/Human-wt/AUS/D388/2013/G3P[8]        | - | 98.9         | -            | -            | -            | -            | -            | -            | -            | -            | -            | - |
| RVA/Human-wt/JPN/ITO/1981/G3P[8]         | - | <b>88.8</b>  | -            | -            | -            | -            | -            | -            | -            | -            | -            | - |
| RVA/Human-wt/BEL/BE87/2011/G2P[4]        | - | -            | -            | -            | -            | -            | 91.7*        | <b>87.5*</b> | -            | <b>49.9*</b> | <b>72.6*</b> | - |
| RVA/Human-wt/ITA/PA108/2007/G2P[4]       | - | -            | -            | -            | 96.0         | 98.6         | 98.0*        | -            | -            | -            | -            | - |
| RVA/Human-wt/JPN/07Y003/2007/G2P[4]      | - | -            | -            | -            | -            | -            | 90.8*        | -            | -            | -            | -            | - |
| RVA/Human-wt/BGN/J306/2010/G2P[4]        | - | -            | -            | -            | -            | -            | 98.7         | -            | -            | -            | -            | - |
| RVA/Human-wt/BRA/QUI-60-F1/2008/G2P[4]   | - | -            | -            | -            | -            | -            | 96.2*        | 94.9*        | 91.5*        | 94.8         | 96.2         | - |
| RVA/Human-wt/BRA/SE19300/2010/G2P[4]     | - | -            | -            | -            | -            | -            | 96.2*        | 90.9*        | 91.1*        | <b>79.7*</b> | 90.3*        | - |
| RVA/Human-wt/BRA/MS11142/2005/G2P[4]     | - | -            | 97.0         | -            | -            | -            | 96.7*        | 91.5*        | 92.2*        | <b>78.5*</b> | 91.7*        | - |
| RVA/Human-wt/JPN/90A009/1990/G2P[4]      | - | -            | -            | -            | -            | -            | -            | -            | <b>89.7*</b> | <b>82.8*</b> | -            | - |
| RVA/Human-wt/JPN/90H094/1990/G2P[4]      | - | -            | -            | 92.9*        | -            | -            | -            | -            | -            | -            | -            | - |
| RVA/Human-wt/JPN/83A001/1983/G2P[4]      | - | -            | <b>88.1*</b> | <b>89.6*</b> | 91.1*        | <b>81.0*</b> | <b>84.5*</b> | <b>76.7</b>  | <b>86.4*</b> | <b>77.7*</b> | <b>81.9*</b> | - |
| RVA/Human-wt/JPN/89Y1520/1989/G2P[4]     | - | -            | <b>86.7*</b> | -            | 91.2*        | <b>80.6*</b> | <b>85.5*</b> | -            | <b>87.8*</b> | <b>84.4*</b> | <b>85.7*</b> | - |
| RVA/Human-tc/KEN/D205/1989/G2P[4]        | - | -            | <b>86.1</b>  | 93.7         | -            | -            | 95.2         | 96.0         | 96.8         | 90.1]        | 93.5         | - |
| RVA/Human-wt/KEN/AK26/1982/G2P[4]        | - | -            | <b>86.2</b>  | 94.4         | 92.1         | -            | 92.5         | <b>83.9</b>  | 95.4         | -            | 93.8         | - |
| RVA/Human-tc/JPN/KUN/1980/G2P[4]         | - | -            | <b>89.0</b>  | 93.6*        | 93.9         | <b>85.1*</b> | 91.7*        | <b>83.0*</b> | 92.1*        | 90.1         | 91.2         | - |
| RVA/Human-wt/JPN/86Y1329/1986/G2P[4]     | - | -            | -            | 94.1*        | -            | -            | <b>85.7*</b> | <b>79.3*</b> | <b>87.7*</b> | -            | -            | - |
| RVA/Human-wt/BGD/MMC6/2005/G2P[4]        | - | -            | -            | 97.7         | 95.7         | -            | 97.6         | -            | 97.9         | <b>89.4</b>  | -            | - |
| RVA/Human-wt/BGN/M334/2013/G2P[4]        | - | -            | -            | -            | -            | -            | 97.8         | -            | -            | -            | -            | - |
| RVA/Human-wt/USA/LB2764/2005/G2P[4]      | - | -            | 97.2         | 96.3*        | 94.5*        | 93.5*        | 94.8*        | 93.7*        | 93.0         | <b>84.8*</b> | 92.4*        | - |
| RVA/Human-wt/USA/LB2772/2005/G2P[4]      | - | -            | -            | -            | -            | -            | 91.8*        | -            | -            | -            | -            | - |
| RVA/Human-wt/AUS/CK20047/2011/G2P[4]     | - | -            | -            | -            | -            | -            | 94.1*        | -            | -            | -            | -            | - |
| RVA/Human-wt/AUS/CK20001/1977/G2P[4]     | - | -            | <b>89.4</b>  | -            | 91.4*        | -            | <b>89.7</b>  | <b>81.4</b>  | -            | <b>84.9*</b> | -            | - |
| RVA/Human-wt/AUS/CK20033/2006/G2P[4]     | - | -            | -            | -            | <b>86.4</b>  | -            | -            | -            | -            | -            | -            | - |
| RVA/Human-wt/JPN/B110119/2011/G2P[4]     | - | -            | -            | -            | 94.4         | -            | <b>89.0</b>  | <b>87.9</b>  | -            | <b>78.0</b>  | -            | - |
| RVA/Human-wt/JPN/B110056/2011/G2P[4]     | - | -            | -            | -            | <b>85.6</b>  | -            | 92.4         | <b>89.1</b>  | -            | <b>87.7</b>  | -            | - |
| RVA/Human-wt/IND/116E3D/1993/G2P[4]      | - | -            | -            | -            | -            | -            | -            | -            | -            | <b>79.4</b>  | -            | - |
| RVA/Human-wt/AUS/V233/1999/G2P[4]        | - | -            | -            | -            | -            | -            | -            | -            | -            | <b>78.4</b>  | -            | - |
| RVA/Human-wt/USA/2007769964/2007/G2P[4]  | - | -            | -            | -            | -            | -            | <b>89.7</b>  | -            | -            | -            | -            | - |
| RVA/Human-wt/ITA/PAI11/1996/G2P[4]       | - | -            | -            | -            | -            | -            | 92.1         | -            | -            | -            | 90.2         | - |
| RVA/Human-wt/BGD/MMC88/2005/G2P[4]       | - | -            | 97.1         | -            | <b>87.3</b>  | 98.5         | -            | -            | -            | <b>88.6</b>  | 97.3         | - |
| RVA/Human-wt/BGD/J303/2010/G2P[4]        | - | -            | -            | 97.5         | <b>87.1</b>  | 98.3         | -            | -            | -            | <b>88.4</b>  | 97.4         | - |
| RVA/Human-wt/CAN/RT128-07/2008/G2P[4]    | - | -            | 94.1         | 96.1*        | 94.3*        | <b>87.1*</b> | -            | -            | -            | <b>69.2*</b> | <b>73.1*</b> | - |
| RVA/Human-wt/BGN/J263/2010/G2P[4]        | - | -            | 93.3         | 97.6         | <b>87.1</b>  | 98.5         | 97.9         | 98.6         | 97.6         | 96.8         | -            | - |
| RVA/Human-wt/BRA/RJ12225/2006/G2P[4]     | - | -            | 97.0         | 98.0         | 96.0*        | 92.6*        | -            | -            | -            | -            | -            | - |
| RVA/Human-wt/BRA/MA14286/2007/G2P[4]     | - | -            | 97.0         | 98.1         | 95.9*        | 91.0*        | -            | -            | -            | -            | -            | - |
| RVA/Human-wt/BRA/SC19868/2011/G2P[4]     | - | -            | -            | 97.9         | 94.5*        | 95.5         | -            | -            | -            | -            | -            | - |
| RVA/Human-wt/GHA/Ghan-148/2007/G2P[4]    | - | -            | -            | -            | 94.2*        | <b>85.5*</b> | -            | -            | -            | -            | -            | - |
| RVA/Human-wt/BGN/J253/2010/G2P[4]        | - | -            | -            | -            | 93.7         | -            | -            | -            | -            | -            | -            | - |
| RVA/Human-wt/BRA/ES16238/2009/G2P[4]     | - | -            | -            | 97.0         | <b>85.8*</b> | 94.3*        | -            | -            | -            | -            | -            | - |
| RVA/Human-wt/COD/DRC86/2003/G8P[6]       | - | -            | 96.5         | 97.7         | 96.6         | 96.0         | 96.5         | 96.9         | 98.0         | 90.9         | 97.5         | - |
| RVA/Human-wt/IND/RV09/2009/G9P[4]        | - | -            | -            | -            | -            | -            | 98.5         | -            | -            | -            | -            | - |
| RVA/Human-wt/BRA/QUI-154-F1/2010/G12P[6] | - | -            | -            | -            | -            | -            | 94.5*        | 90.4*        | <b>88.9*</b> | <b>87.3</b>  | 96.4         | - |
| RVA/Human-wt/BGD/RV161/2000/G12P[6]      | - | -            | 97.8         | 98.0         | 96.4         | 97.4         | 97.0         | 97.8         | 98.0         | -            | 98.4         | - |
| RVA/Human-wt/CHN/TB-Chen/1996/G2P[4]     | - | -            | <b>89.4</b>  | 96.3         | 93.4         | <b>87.0</b>  | 96.2         | <b>86.3</b>  | 97.5         | <b>89.6</b>  | 97.4         | - |
| RVA/Human-wt/MWI/MW670/1999/G4P[8]       | - | <b>87.6</b>  | -            | -            | -            | -            | -            | -            | -            | -            | -            | - |
| RVA/Human-wt/MWI/OP530/1999/G4P[8]       | - | <b>87.6</b>  | -            | -            | -            | -            | -            | -            | -            | -            | -            | - |
| RVA/Human-wt/BEL/B1711/2002/G6P[6]       | - | -            | -            | -            | -            | 97.1         | 96.2         | 97.1         | 97.9         | <b>89.2</b>  | 97.9         | - |
| RVA/Human-wt/IND/RV11/2011/G9P[4]        | - | -            | -            | -            | -            | -            | 98.7         | -            | -            | -            | -            | - |
| RVA/Human-tc/USA/WI61/1983/G9P[8]        | - | 92.2         | -            | -            | -            | -            | -            | -            | -            | -            | -            | - |
| RVA/Human-wt/MWI/F45/1987/G9P[8]         | - | 91.5         | -            | -            | -            | -            | -            | -            | -            | -            | -            | - |
| RVA/Human-wt/PRY/469/2000/G9P[8]         | - | 98.1         | -            | -            | -            | -            | -            | -            | -            | -            | -            | - |
| RVA/Human-wt/THA/CU616-TK/09/2009/G9P[8] | - | 96.8         | -            | -            | -            | -            | -            | -            | -            | -            | -            | - |
| RVA/Human-wt/PHL/L26/1987/G12P[4]        | - | -            | <b>86.3*</b> | 96.9         | -            | <b>76.6*</b> | -            | -            | 96.0         | -            | -            | - |
| RVA/Human-tc/KEN/KDH651/2010/G12P[8]     | - | 95.4         | -            | -            | -            | -            | -            | -            | -            | -            | -            | - |
| RVA/Human-wt/BRA/RJ12419/2006/G12P[8]    | - | 97.5         | -            | -            | -            | -            | -            | -            | -            | -            | -            | - |

\*Nucleotide identity is based on partial ORF sequences and/or incomplete sequences.

## (D)

| IAL-R3172                              | Nucleotide identity (%) |      |      |      |      |      |      |      |      |             |      |   |
|----------------------------------------|-------------------------|------|------|------|------|------|------|------|------|-------------|------|---|
|                                        | VP7                     | VP4  | VP1  | VP2  | VP3  | VP6  | NSP1 | NSP2 | NSP3 | NSP4        | NSP5 |   |
| RVA/Human-wt/BRA/IAL-R3122/2013/G1P[8] | 100                     | 99.8 | 99.6 | 99.7 | 99.9 | 99.8 | 99.8 | 99.8 | 99.7 | 100         | 99.7 | - |
| RVA/Human-wt/BRA/IAL-R3123/2013/G1P[8] | 100                     | 99.8 | 99.5 | 99.8 | 99.9 | 100  | 99.8 | 99.9 | 99.6 | 99.8        | 99.8 | - |
| RVA/Human-wt/BRA/IAL-R3165/2013/G1P[8] | 100                     | 99.9 | 99.4 | 99.8 | 99.9 | 99.8 | 99.9 | 99.9 | 99.9 | 99.8        | 99.8 | - |
| RVA/Human-wt/MWI/BID2BS/2013/G1P[8]    | <b>85.1</b>             | 94.5 | 94.0 | 97.2 | 95.8 | 98.0 | 97.3 | 97.3 | 97.5 | 91.3        | 97.5 | - |
| RVA/Human-wt/JPN/OH3625/2012/G1P[8]    | -                       | -    | -    | -    | -    | -    | -    | -    | -    | <b>86.2</b> | -    | - |

|                                                |              |              |              |              |             |              |              |              |              |              |              |
|------------------------------------------------|--------------|--------------|--------------|--------------|-------------|--------------|--------------|--------------|--------------|--------------|--------------|
| RVA/Human-wt/JPN/KN041/2012/G1P[8]             | -            | -            | -            | -            | -           | -            | -            | -            | -            | <b>84.8</b>  | -            |
| RVA/Human-wt/JPN/HC12016/2012/G1P[8]           | 93.5*        | 99.3         | 99.0         | 98.4*        | 97.9*       | 94.0*        | -            | 91.9*        | 93.0*        | 90.8*        | <b>89.3*</b> |
| RVA/Human-wt/THA/PCB-180/2013/G1P[8]           | 98.3         | 97.8         | 99.3         | 99.1         | 98.9        | 99.0         | -            | 98.4*        | 99.4         | 97.2         | 97.3*        |
| RVA/Human-wt/PHI/TGO12-004/2012/G1P[8]         | 98.6         | -            | -            | -            | -           | 97.9         | -            | 97.4         | 99.7         | 98.4         | -            |
| RVA/Human-wt/PHI/TGO12-045/2012/G1P[8]         | -            | 98.8         | -            | 99.6         | 98.9        | -            | 99.8         | -            | -            | -            | 99.1         |
| RVA/Human-wt/THA/SKT-109/2013/G1P[8]           | -            | -            | -            | -            | -           | -            | 99.8         | -            | -            | -            | -            |
| RVA/Human-wt/JPN/To14-41/2014/G1P[8]           | -            | -            | -            | -            | -           | -            | 98.0*        | -            | -            | -            | -            |
| RVA/Human-wt/VNM/SP026/2012/G1P[8]             | 90.5*        | 97.8         | 98.1         | 97.5*        | 96.6*       | 96.1*        | 96.6*        | 94.2*        | 95.2         | 92.2*        | 94.9*        |
| RVA/Human-wt/BGD/Dhaka16/2003/G1P[8]           | 96.3         | 97.4         | -            | -            | -           | -            | -            | -            | -            | -            | -            |
| RVA/Vaccine/USA/Rotarix-AROLA490AB/1988/G1P[8] | <b>89.7*</b> | <b>89.4</b>  | -            | -            | -           | -            | -            | -            | -            | -            | -            |
| RVA/Vaccine/USA/RotaTeq-WI79-9/1992/G1P7[5]    | 91.6         | 91.7         | -            | -            | -           | -            | -            | -            | -            | -            | -            |
| RVA/Human-wt/BEL/B74-02/2002/G1P[8]            | <b>89.1*</b> | -            | -            | -            | -           | -            | -            | -            | -            | -            | -            |
| RVA/Human-wt/USA/2007719635/2007/G1P[8]        | 94.7*        | -            | -            | -            | -           | -            | -            | -            | -            | -            | -            |
| RVA/Human-wt/USA/CU957-KK/11/2011/G1P[8]       | <b>87.1*</b> | -            | -            | -            | -           | -            | -            | -            | -            | -            | -            |
| RVA/Human-tc/USA/D/1974/G1P[8]                 | <b>84.5*</b> | -            | -            | -            | -           | -            | -            | -            | -            | -            | -            |
| RVA/Human-wt/USA/Wa/1974/G1P[8]                | -            | <b>89.7</b>  | -            | -            | -           | -            | -            | -            | -            | -            | -            |
| RVA/Human-wt/BEL/BE00094/2009/G1P[8]           | -            | 95.5         | -            | -            | -           | -            | -            | -            | -            | -            | -            |
| RVA/Human-tc/USA/K54/xxxx/G1P[x]               | <b>84.9*</b> | -            | -            | -            | -           | -            | -            | -            | -            | -            | -            |
| RVA/Human-wt/JPN/AU19/xxxx/G1P[x]              | <b>78.8*</b> | -            | -            | -            | -           | -            | -            | -            | -            | -            | -            |
| RVA/Bovine-wt/XXX/T449/xxxx/G1P[x]             | <b>85.7</b>  | -            | -            | -            | -           | -            | -            | -            | -            | -            | -            |
| RVA/Human-wt/BRA/QUI-150-F1/2010/G1P[8]        | <b>88.2*</b> | -            | -            | -            | -           | -            | -            | -            | -            | -            | -            |
| RVA/Human-wt/BRA/R321-2004/2004/G1P[x]         | 91.0         | -            | -            | -            | -           | -            | -            | -            | -            | -            | -            |
| RVA/Human-tc/BRA/R70/1997/G1P[9]               | 91.0*        | -            | -            | -            | -           | -            | -            | -            | -            | -            | -            |
| RVA/Human-wt/PAR/Py03IPN144/2002-2005/G1P[8]   | <b>85.7*</b> | -            | -            | -            | -           | -            | -            | -            | -            | -            | -            |
| RVA/Pig-tc/VEN/C60/xxxx/G1P[x]                 | <b>84.5</b>  | -            | -            | -            | -           | -            | -            | -            | -            | -            | -            |
| RVA/Human-wt/ISR/Isr-56/1995/G1P[x]            | <b>85.1*</b> | -            | -            | -            | -           | -            | -            | -            | -            | -            | -            |
| RVA/Human-wt/BRA/Brz-6/1995/G1P[x]             | <b>84.1*</b> | -            | -            | -            | -           | -            | -            | -            | -            | -            | -            |
| RVA/Human-wt/JPN/87Y1397/xxxx/G1P[8]           | 92.9         | -            | -            | -            | -           | -            | -            | -            | -            | -            | -            |
| RVA/Human-wt/KOR/Kor-64/1988/G1P[x]            | <b>85.4*</b> | -            | -            | -            | -           | -            | -            | -            | -            | -            | -            |
| RVA/Human-wt/ITA/PA10/90/1990/G1P[8]           | <b>83.5*</b> | -            | -            | -            | -           | -            | -            | -            | -            | -            | -            |
| RVA/Human-wt/ITA/PA78/89/1989/G1P[8]           | <b>84.0*</b> | -            | -            | -            | -           | -            | -            | -            | -            | -            | -            |
| RVA/Human-wt/URY/Mvd9606/1996/G1P[8]           | 94.1         | -            | -            | -            | -           | -            | -            | -            | -            | -            | -            |
| RVA/Human-wt/ITA/PA33/99/1999/G1P[8]           | <b>83.3*</b> | -            | -            | -            | -           | -            | -            | -            | -            | -            | -            |
| RVA/Human-wt/NCA/9J/2010/G1P[8]                | <b>88.4*</b> | 97.2         | -            | -            | -           | -            | -            | -            | -            | -            | -            |
| RVA/Human-wt/AUS/CK00083/2008/G1P[8]           | 92.5*        | -            | -            | -            | -           | -            | -            | -            | -            | -            | -            |
| RVA/Human-wt/URY/Mvd9806/1996/G1P[8]           | 97.1         | -            | -            | -            | -           | -            | -            | -            | -            | -            | -            |
| RVA/Human-wt/ITA/PA258/97/1997/G1P[8]          | <b>82.7*</b> | -            | -            | -            | -           | -            | -            | -            | -            | -            | -            |
| RVA/Human-wt/AUS/WAPC1740/2013/G3P[8]          | -            | -            | -            | -            | -           | -            | 99.8         | 99.7         | -            | -            | -            |
| RVA/Human-wt/AUS/WAPC2016/2014/G3P[8]          | -            | -            | -            | 99.3         | 98.7        | 99.7         | -            | -            | -            | -            | 99.2         |
| RVA/Human-wt/ESP/SS98244047/2015/G3P[8]        | -            | -            | -            | -            | -           | -            | -            | 99.6         | 99.6         | 97.7         | 98.8         |
| RVA/Human-wt/JPN/IS1078/2015/G3P[8]            | -            | -            | -            | -            | -           | 99.2         | 99.5         | -            | 99.8         | 97.4         | -            |
| RVA/Human-wt/USA/3000390639/2015/G3P[8]        | -            | -            | 98.6         | -            | -           | -            | -            | -            | -            | -            | -            |
| RVA/Human-wt/HUN/ERN8263/2015/G3P[8]           | -            | -            | 98.8         | -            | -           | -            | -            | -            | -            | -            | -            |
| RVA/Human-wt/THA/SKT-289/2013/G3P[8]           | -            | 98.5         | -            | 99.2         | 99.2        | -            | -            | -            | -            | -            | -            |
| RVA/Human-wt/USA/DC23/1976/G3P[8]              | -            | <b>89.7*</b> | -            | -            | -           | -            | -            | -            | -            | -            | -            |
| RVA/Human-wt/AUS/D388/2013/G3P[8]              | -            | 98.9         | -            | -            | -           | -            | -            | -            | -            | -            | -            |
| RVA/Human-wt/JPN/ITO/1981/G3P[8]               | -            | <b>88.8</b>  | -            | -            | -           | -            | -            | -            | -            | -            | -            |
| RVA/Human-wt/BEL/BE87/2011/G2P[4]              | -            | -            | -            | -            | -           | -            | 91.8*        | <b>87.6*</b> | -            | <b>49.9*</b> | <b>72.7*</b> |
| RVA/Human-wt/ITA/PA108/2007/G2P[4]             | -            | -            | -            | -            | 95.9        | 98.6         | 98.0*        | -            | -            | -            | -            |
| RVA/Human-wt/JPN/07Y003/2007/G2P[4]            | -            | -            | -            | -            | -           | -            | 90.8*        | -            | -            | -            | -            |
| RVA/Human-wt/BGN/J306/2010/G2P[4]              | -            | -            | -            | -            | -           | -            | 98.8         | -            | -            | -            | -            |
| RVA/Human-wt/BRA/QUI-60-F1/2008/G2P[4]         | -            | -            | -            | -            | -           | -            | 96.3*        | 94.8*        | 91.5*        | 94.6         | 96.0         |
| RVA/Human-wt/BRA/SE19300/2010/G2P[4]           | -            | -            | -            | -            | -           | -            | 96.3*        | 90.9*        | 91.1*        | <b>79.6*</b> | 90.4*        |
| RVA/Human-wt/BRA/MS11142/2005/G2P[4]           | -            | -            | 97.3         | -            | -           | -            | 96.8*        | 91.5*        | 92.2*        | <b>78.4*</b> | 91.9*        |
| RVA/Human-wt/JPN/90A009/1990/G2P[4]            | -            | -            | -            | -            | -           | -            | -            | -            | <b>89.7*</b> | <b>82.6*</b> | -            |
| RVA/Human-wt/JPN/90H094/1990/G2P[4]            | -            | -            | -            | 93.0*        | -           | -            | -            | -            | -            | -            | -            |
| RVA/Human-wt/JPN/83A001/1983/G2P[4]            | -            | -            | <b>88.4*</b> | <b>89.6*</b> | 91.1*       | <b>81.1*</b> | <b>84.6*</b> | <b>76.7</b>  | <b>86.4*</b> | <b>77.6*</b> | <b>82.1*</b> |
| RVA/Human-wt/JPN/89Y1520/1989/G2P[4]           | -            | -            | <b>87.0*</b> | -            | 91.2*       | <b>80.7*</b> | <b>85.6*</b> | -            | <b>87.8*</b> | <b>84.2*</b> | <b>85.9*</b> |
| RVA/Human-tc/KEN/D205/1989/G2P[4]              | -            | -            | <b>86.1</b>  | 93.6         | -           | -            | 95.2         | 96.0         | 96.7         | 90.1         | 93.3         |
| RVA/Human-wt/KEN/AK26/1982/G2P[4]              | -            | -            | <b>86.4</b>  | 94.3         | 92.1        | -            | 92.5         | <b>83.9</b>  | 95.3         | -            | 93.7         |
| RVA/Human-tc/JPN/KUN/1980/G2P[4]               | -            | -            | <b>89.2</b>  | 93.7*        | 93.8        | <b>85.1*</b> | 91.8*        | <b>83.0*</b> | 92.1*        | 90.0         | 91.4         |
| RVA/Human-wt/JPN/86Y1329/1986/G2P[4]           | -            | -            | -            | 94.1*        | -           | -            | <b>85.7*</b> | <b>79.3*</b> | <b>87.7*</b> | -            | -            |
| RVA/Human-wt/BGD/MMC6/2005/G2P[4]              | -            | -            | -            | 97.6         | 95.7        | -            | 97.7         | -            | 97.8         | <b>89.3</b>  | -            |
| RVA/Human-wt/BGN/M334/2013/G2P[4]              | -            | -            | -            | -            | -           | -            | 97.8         | -            | -            | -            | -            |
| RVA/Human-wt/USA/LB2764/2005/G2P[4]            | -            | -            | 97.3         | 96.3*        | 94.5*       | 93.5*        | 94.8*        | 93.7*        | 93.0         | <b>84.6*</b> | 92.5*        |
| RVA/Human-wt/USA/LB2772/2005/G2P[4]            | -            | -            | -            | -            | -           | 91.8*        | -            | -            | -            | -            | -            |
| RVA/Human-wt/AUS/CK20047/2011/G2P[4]           | -            | -            | -            | -            | -           | 94.1*        | -            | -            | -            | -            | -            |
| RVA/Human-wt/AUS/CK20001/1977/G2P[4]           | -            | -            | <b>89.6</b>  | -            | 91.4*       | -            | <b>89.7</b>  | <b>81.4</b>  | -            | <b>84.8*</b> | -            |
| RVA/Human-wt/AUS/CK20033/2006/G2P[4]           | -            | -            | -            | -            | <b>86.4</b> | -            | -            | -            | -            | -            | -            |
| RVA/Human-wt/JPN/B110119/2011/G2P[4]           | -            | -            | -            | -            | 94.5        | -            | <b>89.0</b>  | <b>87.9</b>  | -            | <b>78.0</b>  | -            |
| RVA/Human-wt/JPN/B110056/2011/G2P[4]           | -            | -            | -            | -            | <b>85.6</b> | -            | 92.4         | <b>89.2</b>  | -            | <b>87.6</b>  | -            |

|                                          |   |             |              |       |              |              |       |             |              |             |              |              |
|------------------------------------------|---|-------------|--------------|-------|--------------|--------------|-------|-------------|--------------|-------------|--------------|--------------|
| RVA/Human-wt/IND/116E3D/1993/G2P[4]      | - | -           | -            | -     | -            | -            | -     | -           | -            | -           | <b>79.3</b>  | -            |
| RVA/Human-wt/AUS/V233/1999/G2P[4]        | - | -           | -            | -     | -            | -            | -     | -           | -            | -           | <b>78.2</b>  | -            |
| RVA/Human-wt/USA/2007769964/2007/G2P[4]  | - | -           | -            | -     | -            | -            | -     | <b>89.7</b> | -            | -           | -            | -            |
| RVA/Human-wt/ITA/PAI11/1996/G2P[4]       | - | -           | -            | -     | -            | -            | -     | 92.1        | -            | -           | 90.1         | -            |
| RVA/Human-wt/BGD/MMC88/2005/G2P[4]       | - | -           | 97.3         | -     | <b>87.2</b>  | 98.5         | -     | -           | -            | -           | <b>88.5</b>  | 97.1         |
| RVA/Human-wt/BGD/J303/2010/G2P[4]        | - | -           | -            | 97.5  | <b>87.0</b>  | 98.3         | -     | -           | -            | -           | <b>88.2</b>  | 97.3         |
| RVA/Human-wt/CAN/RT128-07/2008/G2P[4]    | - | -           | 93.8         | 96.1* | 94.2*        | <b>87.1*</b> | -     | -           | -            | -           | <b>69.2*</b> | <b>73.2*</b> |
| RVA/Human-wt/BGN/J263/2010/G2P[4]        | - | -           | 93.6         | 97.5  | <b>87.0</b>  | 98.5         | 98.0  | 98.7        | 97.5         | 96.6        | -            | -            |
| RVA/Human-wt/BRA/RJ12225/2006/G2P[4]     | - | -           | 97.3         | 98.0  | 96.0*        | 92.6*        | -     | -           | -            | -           | -            | -            |
| RVA/Human-wt/BRA/MA14286/2007/G2P[4]     | - | -           | 97.3         | 98.0  | 95.8*        | 91.0*        | -     | -           | -            | -           | -            | -            |
| RVA/Human-wt/BRA/SC19868/2011/G2P[4]     | - | -           | -            | 97.8  | 94.5*        | 95.5         | -     | -           | -            | -           | -            | -            |
| RVA/Human-wt/GHA/Ghan-148/2007/G2P[4]    | - | -           | -            | -     | 94.2*        | <b>85.5*</b> | -     | -           | -            | -           | -            | -            |
| RVA/Human-wt/BGN/J253/2010/G2P[4]        | - | -           | -            | -     | 93.7         | -            | -     | -           | -            | -           | -            | -            |
| RVA/Human-wt/BRA/ES16238/2009/G2P[4]     | - | -           | -            | 96.9  | <b>85.7*</b> | 94.3*        | -     | -           | -            | -           | -            | -            |
| RVA/Human-wt/COD/DRC86/2003/G8P[6]       | - | -           | 96.8         | 97.6  | 96.6         | 96.0         | 96.6  | 96.9        | 97.9         | 90.8        | 97.4         | -            |
| RVA/Human-wt/IND/RV09/2009/G9P[4]        | - | -           | -            | -     | -            | -            | 98.6  | -           | -            | -           | -            | -            |
| RVA/Human-wt/BRA/QUI-154-F1/2010/G12P[6] | - | -           | -            | -     | -            | -            | 94.5* | 90.5*       | <b>88.9*</b> | <b>87.2</b> | 96.3         | -            |
| RVA/Human-wt/BGD/RV161/2000/G12P[6]      | - | -           | 98.0         | 98.0  | 96.3         | 97.4         | 97.1  | 97.8        | 97.9         | -           | 98.2         | -            |
| RVA/Human-wt/CHN/TB-Chen/1996/G2P[4]     | - | -           | <b>89.7</b>  | 96.2  | 93.4         | <b>87.1</b>  | 96.2  | <b>86.3</b> | 97.4         | <b>89.4</b> | 97.3         | -            |
| RVA/Human-wt/MWI/MW670/1999/G4P[8]       | - | <b>87.6</b> | -            | -     | -            | -            | -     | -           | -            | -           | -            | -            |
| RVA/Human-wt/MWI/OP530/1999/G4P[8]       | - | <b>87.6</b> | -            | -     | -            | -            | -     | -           | -            | -           | -            | -            |
| RVA/Human-wt/BEL/B1711/2002/G6P[6]       | - | -           | -            | -     | -            | 97.1         | 96.3  | 97.1        | 97.8         | <b>89.0</b> | 97.7         | -            |
| RVA/Human-wt/IND/RV11/2011/G9P[4]        | - | -           | -            | -     | -            | -            | 98.7  | -           | -            | -           | -            | -            |
| RVA/Human-tc/USA/WI61/1983/G9P[8]        | - | 92.2        | -            | -     | -            | -            | -     | -           | -            | -           | -            | -            |
| RVA/Human-wt/MWI/F45/1987/G9P[8]         | - | 91.5        | -            | -     | -            | -            | -     | -           | -            | -           | -            | -            |
| RVA/Human-wt/PRY/469/2000/G9P[8]         | - | 98.1        | -            | -     | -            | -            | -     | -           | -            | -           | -            | -            |
| RVA/Human-wt/THA/CU616-TK/09/2009/G9P[8] | - | 96.8        | -            | -     | -            | -            | -     | -           | -            | -           | -            | -            |
| RVA/Human-wt/PHL/L26/1987/G12P[4]        | - | -           | <b>86.4*</b> | 96.8  | -            | <b>76.7*</b> | -     | -           | 95.9         | -           | -            | -            |
| RVA/Human-tc/KEN/KDH651/2010/G12P[8]     | - | 95.4        | -            | -     | -            | -            | -     | -           | -            | -           | -            | -            |
| RVA/Human-wt/BRA/RJ12419/2006/G12P[8]    | - | 97.5        | -            | -     | -            | -            | -     | -           | -            | -           | -            | -            |

\*Nucleotide identity is based on partial ORF sequences.
